# Supplementary material for: Pre-left ventricular assist device endoscopic evaluation does not reduce the risk of later gastrointestinal bleeding: a multicenter study
Source: PubMed Central journal article supplement — Ann Gastroenterol. 2024 Apr 10;37(3):313–20. doi: 10.20524/aog.2024.0878 (PMC11107400; doi:10.20524/aog.2024.0878), 2024-04-10
Supplement: AnnGastroenterol-37-313_Suppl1.pdf [file AnnGastroenterol-37-313_Suppl1.pdf]

## Supplementary material

**Supplementary Table 1** Time to bleed after LVAD placement in both screened and unscreened cohort

|                          | Screening (No) |                |              | Screening (Yes) |                 |              |
|--------------------------|----------------|----------------|--------------|-----------------|-----------------|--------------|
|                          | N              | Mean (SD)      | Median (IQR) | N               | Mean (SD)       | Median (IQR) |
| Time to 1st bleed (days) | 62             | 121.53 (97.81) | 86 (38-197)  | 51              | 118.08 (104.39) | 76 (36-197)  |

LVAD, left ventricular assist device; IQR, interquartile range; SD, standard deviation

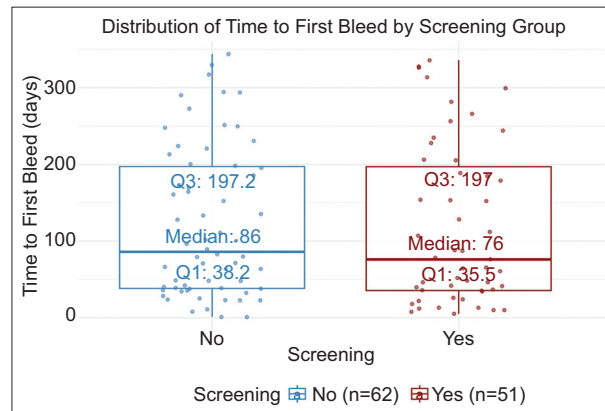

**Supplementary Figure 1** Boxplot depicting time to first post-LVAD bleed in the endoscopy and no-preoperative-endoscopy cohorts. The boxplot on the left corresponds to the no-endoscopy cohort (median: 86 days, IQR: 38-197), while the one on the right represents the preoperative endoscopy cohort (median: 76 days, IQR: 36-197)  
LVAD, left ventricular assist device; IQR, interquartile range
